# Supplementary material
Source: MDPI journal article supplement (https://www.mdpi.com/2073-4441/14/1/113)
Supplement: s1 [file s1]

# Supplementary materials

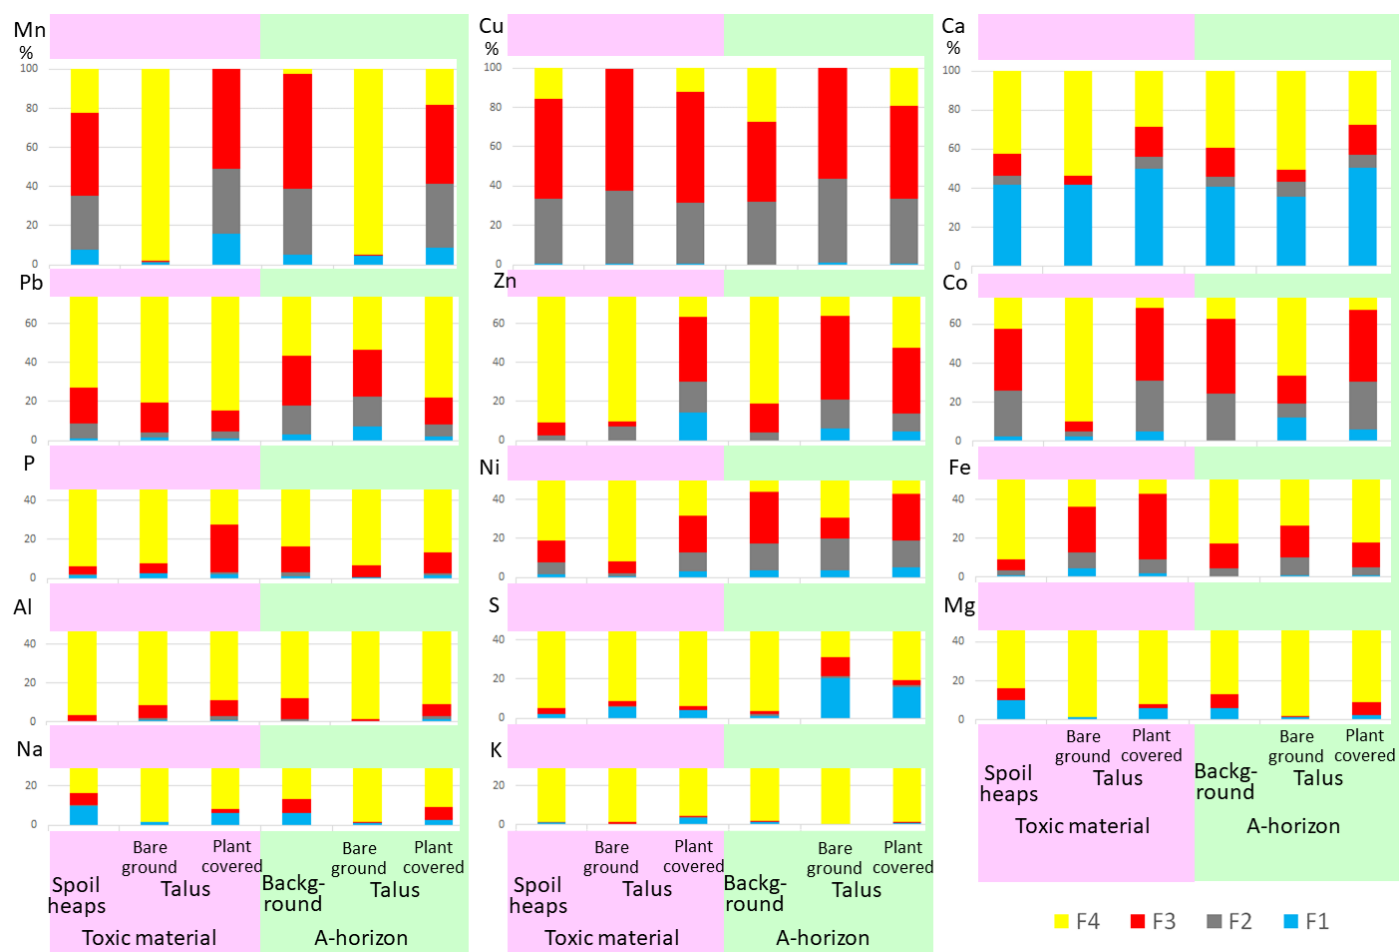

**Figure S1.** Chemical element speciation (average percentage) in the Spolic A-horizons studied.

**Table S1.** Main morphological features of soils studied in the Kireevskii and Uzlovskii districts of the Tula region [26–28,39]

| Location        | Soil                                                                                                                       | Horizon [41], | Munsell color | Texture | Structure | Roots | Boundary |              |
|-----------------|----------------------------------------------------------------------------------------------------------------------------|---------------|---------------|---------|-----------|-------|----------|--------------|
|                 |                                                                                                                            | depth, cm     | moist         |         |           |       | Shape    | Distinctness |
| Spoil heaps     | Spolic Technosols (Arenic/Loamic, Dystric, Sulfidic, Phytotoxic) on toxic technogenic materials                            | Chu, 0–100    | 5Y2.5/2       | S/L     | no        |       |          |              |
|                 |                                                                                                                            |               |               |         |           |       |          |              |
|                 | Spolic Technosols (Loamic, Eutric, Phytotoxic) on toxic technogenic materials                                              | Cu, 0–40      | 2.5Y2.5/1     | L       | no        |       | Wavy     | Abrupt       |
|                 |                                                                                                                            | Chu, 40–120   | 5Y2.5/1       | L       | no        |       |          |              |
|                 | Technosols (Dystric, Loamic, Molic, Organotransportic)                                                                     | O, 0–4        | 10YR2/1       | CL      | crumby    | f3    | Wavy     | Abrupt       |
|                 |                                                                                                                            | Ak, 4–28      | 10YR2/1       | CL      | crumby    | f2    | Wavy     | Abrupt       |
|                 |                                                                                                                            | Cox, 28–47    | 10YR5/4       | CL      | massive   |       | Wavy     | Abrupt       |
| Talus           | Dystric Colluvic Stagnic Regosols (Loamic, Lamellic, Loaminovic, Sulfidic, Phytotoxic) on toxic materials of deluvial fans | Ckh, 47–65    | 10YR5/(3-4)   | CL/L    | massive   |       |          |              |
|                 |                                                                                                                            | Chu, 0–100    | 2.5/N         | Ls      | blocky    | f1    | Wavy     | Abrupt       |
|                 |                                                                                                                            | Ab, 100–130   | 2.5/N         | CL      | crumby    | f2    | Wavy     | Abrupt       |
|                 |                                                                                                                            | Bwgb, 130–180 | 10YR4/5       | CL      | SAB       | f2    | Wavy     | Abrupt       |
|                 | Dystric Colluvic Stagnic Regosols (Loamic, Lamellic, Loaminovic) on non-toxic materials of proluvial fans                  | C, 180–220    | 10YR5/6       | CL      | blocky    | f1    |          |              |
|                 |                                                                                                                            | Bs, 0–65      | 2.5/N         | L/ CL   | no        | m2    | Wavy     | Abrupt       |
|                 |                                                                                                                            | Arb, 65–150   | 2.5/5PB       | CL      | crumby    | m2    | Wavy     | Abrupt       |
|                 |                                                                                                                            | Bwrb, 150–175 | 10YR5/4       | CL      | blocky    | f1    | Wavy     | Abrupt       |
|                 | Chernic Phaeozems (Loamic, Loaminovic, Phytotoxic) on carbonated loess like loams                                          | Cr, 175–200   | 10YR6/4       | CL/ C   | blocky    | f1    |          |              |
|                 |                                                                                                                            | C, 0–35       | 7.5YR2.5/1    | L/ CL   | no        | f2    | Smooth   | Abrupt       |
|                 |                                                                                                                            | Ab, 35–125    | 2.5Y2.5/1     | CL      | massive   | f1    | Wavy     | Abrupt       |
|                 |                                                                                                                            | Bwrb, 130–185 | 10YR5/6       | CL      | blocky    |       | Wavy     | Abrupt       |
|                 | Eutric Regosols (Loamic, Technic, Phytotoxic) on toxic technogenic materials                                               | C, 185–210    | 10YR6/4       | CL      | blocky    |       |          |              |
|                 |                                                                                                                            | O, 0–4        | 10YR4/1       | L       | no        | f2    | Wavy     | Abrupt       |
|                 |                                                                                                                            | Bs, 4–16      | 5YR6/8        | L       | no        | f1    | Smooth   | Abrupt       |
|                 |                                                                                                                            | C, 16–35      | 2.5Y3/2       | CL      | massive   | f1    |          |              |
| Unpolluted area | Haplic Chernozems (Aric, Loamic) on carbonated loess like loams                                                            | A, 0–50       | 10YR3/2       | CL      | grainy    | m3    | Wavy     | Abrupt       |
|                 |                                                                                                                            | Bw, 50–90     | 10YR5/6       | CL      | blocky    | f2    | Wavy     | Abrupt       |
|                 |                                                                                                                            | Ck, 90–210    | 7.5YR4/6      | CL      | blocky    |       |          |              |
|                 | Chernic Phaeozems (Loamic) on carbonated loess like loams                                                                  | A, 0–140      | 5Y2.5/1       | CL      | grainy    | c3    | Wavy     | Abrupt       |
|                 |                                                                                                                            | Ckg, 140–180  | 10YR5/4       | CL      | massive   | f2    | Wavy     | Abrupt       |

|            |         |      |         |
|------------|---------|------|---------|
| Cr,180–210 | 10YR5/6 | CL/L | massive |
|------------|---------|------|---------|

Texture classes: CL – Clay loam, L – Loam, S – sand. Structure: M – massive, SBC – fine subangular blocky-crumb, SB – subangular blocky, SAB – subangular-angular blocky, P – coarse blocky-prismatic. Roots: f – fine, m – medium, c – coarse, 1 – single, 2 – few, 3 – many.

**Table S2.** The number of soil samples collected at the sites studied

| Parent materials   | Soil<br>horizons | Site 1         |       | Site 2         | Site 3         | Site 4             |
|--------------------|------------------|----------------|-------|----------------|----------------|--------------------|
|                    |                  | Spoil<br>heaps | Talus | Spoil<br>heaps | Spoil<br>heaps | Unpolluted<br>area |
| Coal bearing rocks | A                | 1              | 5     | 2              | 0              | 0                  |
| riched in sulfur   | B                | 0              | 1     | 1              | 0              | 0                  |
| compounds          | C                | 5              | 15    | 8              | 3              | 0                  |
| Loess like loams   | A                | 0              | 21    | 0              | 1              | 7                  |
|                    | Bk               | 0              | 15    | 0              | 1              | 3                  |
|                    | Ck               | 0              | 6     | 0              | 0              | 3                  |

**Table S3.** The number of surface water samples collected at the sites studied

| Date of<br>sampling | Site 1         |       | Site 2         |       | Site 3 |                           | Site 4                     |                    |
|---------------------|----------------|-------|----------------|-------|--------|---------------------------|----------------------------|--------------------|
|                     | Spoil<br>heaps | Talus | Spoil<br>heaps | Talus | Talus  | Nearer<br>tailing<br>pond | Farther<br>tailing<br>pond | Unpolluted<br>pond |
| 12.12.2019          | 1              | 1     | 0              | 1     | 1      | 1                         | 1                          | 1                  |
| 16.06.2020          | 1              | 2     | 0              | 2     | 1      | 1                         | 1                          | 2                  |
| 16.07.2020          | 0              | 3     | 1              | 2     | 2      | 1                         | 1                          | 1                  |
| 22.08.2020          | 1              | 1     | 0              | 1     | 1      | 0                         | 0                          | 1                  |
| 12.11.2020          | 2              | 1     | 0              | 0     | 1      | 1                         | 1                          | 1                  |

**Table S4.** The root-mean-square deviation values (relative percentage, %) for the X-Ray fluorescence data on the elemental composition of the soils studied

| Concentration,<br>%         | Na <sub>2</sub> O | MgO         | Al <sub>2</sub> O <sub>3</sub> | K <sub>2</sub> O | CaO         | MnO         | Fe <sub>2</sub> O <sub>3</sub> | P <sub>2</sub> O <sub>5</sub> | S           | Co,Ni,Cu,<br>Zn | Pb          |
|-----------------------------|-------------------|-------------|--------------------------------|------------------|-------------|-------------|--------------------------------|-------------------------------|-------------|-----------------|-------------|
| 40–50                       | na                | 0.9         | 0.8                            | na               | 0.7         | 0.5         | <b>0.5</b>                     | na                            | 0.4         | na              | na          |
| 30–40                       | na                | 0.9         | 1.1                            | na               | 0.9         | 0.6         | <b>0.6</b>                     | 0.6                           | 0.5         | na              | na          |
| 20–30                       | na                | 1.3         | <b>1.4</b>                     | na               | 1.1         | 0.7         | <b>0.7</b>                     | 0.8                           | 0.6         | 0.7             | na          |
| 10–20                       | 1.8               | 1.7         | <b>1.8</b>                     | 1.8              | 1.6         | 1.1         | <b>1.1</b>                     | 1.4                           | 0.8         | 1.1             | 1.1         |
| 5–10                        | 2.7               | 2.3         | <b>2.7</b>                     | 2.7              | <b>2.5</b>  | 2.2         | <b>2.2</b>                     | 1.6                           | 1.7         | 1.4             | 1.4         |
| 2–5                         | 4.0               | 3.3         | 4.0                            | <b>4.0</b>       | <b>3.4</b>  | 3.5         | <b>3.5</b>                     | 2.5                           | <b>2.7</b>  | 2.3             | 2.4         |
| 1–2                         | 5.0               | 4.5         | 5.5                            | <b>5.0</b>       | <b>4.7</b>  | 5.0         | <b>5.0</b>                     | 2.2                           | <b>3.8</b>  | 3.4             | 3.4         |
| 0.5–1                       | <b>6.0</b>        | <b>6.5</b>  | 7.5                            | <b>6.0</b>       | <b>6.0</b>  | 6.5         | 6.5                            | <b>3.0</b>                    | <b>5.0</b>  | 4.5             | 4.5         |
| 0.2–0.5                     | <b>8.0</b>        | <b>8.0</b>  | 10.0                           | <b>8.0</b>       | <b>8.5</b>  | 8.5         | 8.5                            | <b>4.1</b>                    | <b>6.0</b>  | 5.5             | 5.5         |
| 0.1–0.2                     | <b>10.0</b>       | <b>10.5</b> | 12.5                           | 10.0             | <b>10.5</b> | <b>10.5</b> | 10.5                           | <b>4.7</b>                    | <b>7.0</b>  | 7.0             | 7.0         |
| (1000–500)×10 <sup>–4</sup> | 12.0              | 13.5        | 14.0                           | 12.0             | 13.5        | <b>12.5</b> | 12.5                           | <b>6.0</b>                    | <b>8.5</b>  | 9.0             | <b>8.5</b>  |
| (500–200)×10 <sup>–4</sup>  | 14.0              | 15.0        | 15.0                           | 14.0             | 15.0        | <b>14.0</b> | 14.0                           | <b>8.0</b>                    | <b>10.5</b> | <b>10.5</b>     | <b>10.5</b> |
| (200–100)×10 <sup>–4</sup>  | 15.0              | 15.0        | 15.0                           | 15.0             | 15.0        | <b>15.0</b> | 15.0                           | 10.5                          | <b>13.0</b> | <b>12.5</b>     | <b>12.5</b> |
| (100–50)×10 <sup>–4</sup>   | na                | na          | na                             | na               | 15.0        | <b>15.0</b> | 15.0                           | 12.0                          | na          | <b>13.5</b>     | <b>15.0</b> |
| (50–20)×10 <sup>–4</sup>    | na                | na          | na                             | na               | na          | <b>15.0</b> | na                             | 12.5                          | na          | <b>15.0</b>     | <b>15.0</b> |
| (20–10)×10 <sup>–4</sup>    | na                | na          | na                             | na               | na          | <b>15.0</b> | na                             | na                            | na          | <b>20.0</b>     | <b>15.0</b> |

na – not available. The root-mean-square deviation values for concentration of chemical elements in samples analyzed are in bold.

Table S5. Lower detection limits and the quality of the analysis and quality control for plant and water samples.

| ChEs | Plants                          |                         |      |           |       |           |       |           |      |                           |  |                    |  |                           |  |                 | Water |                                  |                           |             |                    |     |
|------|---------------------------------|-------------------------|------|-----------|-------|-----------|-------|-----------|------|---------------------------|--|--------------------|--|---------------------------|--|-----------------|-------|----------------------------------|---------------------------|-------------|--------------------|-----|
|      | Lower detection<br>limit, mg/kg | Analyzed samples, mg/kg |      |           |       |           |       |           |      | Control samples, mg/kg    |  |                    |  |                           |  |                 |       | Lower<br>detected limit,<br>µg/l |                           |             |                    |     |
|      |                                 | Sample #1               |      | Sample #2 |       | Sample #3 |       | Sample #4 |      | COOMET CRM 0067-2008-RU   |  |                    |  | INCT-OBTL-5               |  |                 |       |                                  | INCT-PVTL-6               |             |                    |     |
|      |                                 | 1                       | 2    | 1         | 2     | 1         | 2     | 1         | 2    | Measured<br>concentration |  | Certified<br>value |  | Measured<br>concentration |  | Certified value |       |                                  | Measured<br>concentration |             | Certified<br>value |     |
| Na   | 2                               | 24.7                    | 24.4 | 27.3      | 16.5  | 18.9      | 21.0  | 19.7      | 21.9 | 55.3                      |  | 180 ± 30           |  | 232                       |  | 435             |       | 23.2                             |                           | 62.4        |                    | 8   |
| Mg   | 1                               | 3723                    | 3652 | 1906      | 1962  | 1998      | 2089  | 1179      | 1195 | 4406                      |  | 4400 ± 300         |  | 8846                      |  | 8530 ± 340      |       | 2436                             |                           | 2410 ± 90   |                    | 5   |
| Al   | 2                               | 105                     | 103  | 280       | 297   | 107       | 127   | 42.8      | 41.0 | 734                       |  | 830 ± 100          |  | 2150                      |  | 1980 ± 280      |       | 231                              |                           | 252 ± 49    |                    | 2   |
| P    | 6                               | 2667                    | 2629 | 1731      | 1784  | 2015      | 2088  | 1646      | 1661 | 1513                      |  | 1540 ± 60          |  | 1787                      |  | 1700 ± 120      |       | 2534                             |                           | 2420 ± 150  |                    | 17  |
| K    | 2                               | 7976                    | 8029 | 10581     | 11415 | 10741     | 11331 | 10105     | 9921 | 7421                      |  | 7100 ± 400         |  | 23061                     |  | 22710 ± 760     |       | 24891                            |                           | 26400 ± 900 |                    | 7   |
| Ca   | 1                               | 10021                   | 9961 | 7362      | 7380  | 7484      | 7831  | 3348      | 3633 | 15906                     |  | 16000 ± 900        |  | 40687                     |  | 39960 ± 1420    |       | 22887                            |                           | 22970 ± 780 |                    | 7   |
| Mn   | 0.1                             | 952                     | 929  | 95        | 99    | 1681      | 1751  | 324       | 329  | 945                       |  | 930 ± 70           |  | 185                       |  | 180 ± 6         |       | 138                              |                           | 136 ± 5     |                    | 0.3 |
| Fe   | 1.4                             | 152                     | 223  | 159       | 162   | 248       | 317   | 59        | 60   | 743                       |  | 730 ± 70           |  | 1610                      |  | 1490            |       | 282                              |                           | 258         |                    | 7   |
| Co   | 0.04                            | 1.3                     | 1.3  | 0.65      | 0.64  | 2.84      | 2.87  | 1.82      | 1.90 | 0.79                      |  | 0.79 ± 0.06        |  | 0.87                      |  | 0.98 ± 0.07     |       | 0.13                             |                           | 0.15 ± 0.01 |                    | 0.6 |
| Ni   | 0.2                             | 4.1                     | 4.4  | 4.9       | 4.9   | 8.6       | 9.0   | 4.1       | 4.4  | 6.6                       |  | 5.8 ± 0.8          |  | 8.2                       |  | 8.5 ± 0.49      |       | 1.1                              |                           | 1.49 ± 0.1  |                    | 1   |
| Cu   | 0.2                             | 5.0                     | 5.1  | 7.9       | 8.0   | 6.9       | 7.0   | 3.9       | 4.1  | 6.6                       |  | 7.3 ± 0.6          |  | 9.7                       |  | 10.1 ± 0.4      |       | 4.7                              |                           | 5.12 ± 0.2  |                    | 2   |
| Zn   | 0.2                             | 153                     | 153  | 189       | 202   | 184       | 188   | 191       | 202  | 98.2                      |  | 93.7 ± 15          |  | 50.4                      |  | 52.4 ± 1.8      |       | 41.6                             |                           | 43.6 ± 1.4  |                    | 3   |
| Pb   | 0.02                            | 0.35                    | 0.35 | 0.29      | 0.31  | 0.28      | 0.29  | 0.12      | 0.13 | 3.6                       |  | 3.7 ± 0.5          |  | 2.3                       |  | 2.0 ± 0.3       |       | 0.74                             |                           | 0.97 ± 0.15 |                    | 4   |

**Table S6.** Lower detection limits (LDLs) and the quality of the analysis and quality control for liquid samples of soil extracts.

| ChEs | Nitric acid, µg/dm <sup>3</sup> |       |                  |         |              |        |              |        |              |        |              |        |              |        |
|------|---------------------------------|-------|------------------|---------|--------------|--------|--------------|--------|--------------|--------|--------------|--------|--------------|--------|
|      | LDLs                            | Blank | Analyzed samples |         |              |        |              |        |              |        |              |        |              |        |
|      |                                 |       | Sample no. 1     |         | Sample no. 2 |        | Sample no. 3 |        | Sample no. 4 |        | Sample no. 5 |        | Sample no. 6 |        |
|      |                                 |       | 1                | 2       | 1            | 2      | 1            | 2      | 1            | 2      | 1            | 2      | 1            | 2      |
| Na   | 74                              | 1460  | 5643             | 4890    | 2374         | 2539   | 2673         | 2786   | 3111         | 3501   | 4516         | 4295   | 2718         | 2977   |
| Mg   | 68                              | 2012  | 6241             | 6366    | 4507         | 4700   | 8886         | 8467   | 89838        | 94035  | 105913       | 103372 | 41770        | 42530  |
| Al   | 47                              | 1117  | 2126570          | 2244937 | 86046        | 91706  | 51042        | 50132  | 415963       | 440317 | 478820       | 462221 | 203991       | 205351 |
| P    | 223                             | <LDL  | 2804             | 2521    | 1208         | 1367   | 3741         | 3587   | 5692         | 5724   | 1959         | 1949   | <LDL         | <LDL   |
| K    | 52                              | 385   | 31680            | 32386   | 2950         | 3259   | 6527         | 6632   | 21645        | 22856  | 22381        | 21873  | 8743         | 8800   |
| Ca   | 82                              | 11120 | 77245            | 79817   | 406175       | 405257 | 402501       | 400663 | 367287       | 382597 | 356722       | 349067 | 208823       | 214641 |
| Mn   | 7                               | 44    | 170              | 169     | 118          | 142    | 1985         | 1910   | 40119        | 40932  | 10419        | 10358  | 1910         | 1977   |
| Fe   | 103                             | 1829  | 208756           | 212349  | 376971       | 406135 | 325138       | 313665 | 215805       | 223131 | 189405       | 187884 | 62962        | 62790  |
| Co   | 10                              | <LDL  | 49               | 51      | 97           | 111    | 325          | 316    | 1108         | 1143   | 253          | 242    | 140          | 147    |
| Ni   | 10                              | <LDL  | 159              | 167     | 284          | 314    | 435          | 426    | 1015         | 1050   | 452          | 433    | 293          | 316    |
| Cu   | 7                               | 16    | 408              | 414     | 403          | 433    | 747          | 716    | 299          | 314    | 317          | 319    | 248          | 250    |
| Zn   | 6                               | 289   | 1230             | 1307    | 779          | 863    | 3333         | 3290   | 814          | 891    | 744          | 837    | 349          | 291    |
| Pb   | 44                              | <LDL  | 356              | 381     | 226          | 267    | 643          | 634    | 640          | 699    | 389          | 410    | <LDL         | 62     |
| ChEs | NH <sub>4</sub> Ac              |       |                  |         |              |        |              |        |              |        |              |        |              |        |
| Na   | 101                             | 1556  | 3003             | 2904    | 2607         | 2883   | 2505         | 2835   | 2627         | 3111   | 3897         | 3821   | 7014         | 2561   |
| Mg   | 93                              | 2080  | 3519             | 3541    | 4559         | 4763   | 6953         | 7047   | 38994        | 40238  | 49523        | 49824  | 30715        | 26976  |
| Al   | 46                              | 329   | 171104           | 171761  | 18292        | 18916  | 5834         | 5931   | 22612        | 23260  | 24558        | 26736  | 13397        | 11862  |
| P    | 216                             | <LDL  | <LDL             | 413     | 372          | 313    | 313          | 478    | 514          | 367    | 465          | 567    | 487          | 282    |
| K    | 106                             | <LDL  | 14399            | 13981   | 1270         | 1785   | 4297         | 4224   | 16292        | 17609  | 17318        | 18176  | 6139         | 5229   |
| Ca   | 101                             | 12261 | 77983            | 70067   | 299585       | 326971 | 344373       | 339666 | 334103       | 316273 | 297445       | 297873 | 187472       | 160228 |
| Mn   | 14                              | 87    | 124              | 123     | 163          | 153    | 1831         | 1758   | 22935        | 23035  | 663          | 672    | 285          | 253    |
| Fe   | 68                              | 223   | 13368            | 13986   | 73780        | 71324  | 21483        | 21633  | 4463         | 4467   | 2879         | 3112   | 1139         | 839    |
| Co   | 15                              | <LDL  | <LDL             | 17      | 35           | 38     | 147          | 146    | 553          | 563    | <LDL         | <LDL   | <LDL         | <LDL   |
| Ni   | 13                              | <LDL  | <LDL             | 57      | 25           | 36     | 116          | 112    | 435          | 435    | 87           | 99     | 79           | 64     |
| Cu   | 8                               | 9.4   | 48.6             | 55.8    | <LDL         | <LDL   | 19.6         | 19.6   | <LDL         | 10.9   | 16.7         | 13.8   | 15.2         | 10.9   |
| Zn   | 8                               | 437   | 261.1            | 413.5   | 283.1        | 338    | 869.3        | 770.3  | 89.7         | 63.0   | <LDL         | <LDL   | 36.3         | 36.3   |

|      |                              |         |         |         |         |         |         |         |         |         |         |         |         |         |
|------|------------------------------|---------|---------|---------|---------|---------|---------|---------|---------|---------|---------|---------|---------|---------|
| Pb   | 49                           | <LDL    | <LDL    | <LDL    | 54      | 65      | 176     | 124     | 71      | 80      | 73      | 74      | <LDL    | <LDL    |
| ChEs | NH <sub>4</sub> Ac + 1% EDTA |         |         |         |         |         |         |         |         |         |         |         |         |         |
| Na   | 120                          | 1326431 | 1350849 | 1327716 | 1286591 | 1320005 | 1353419 | 1343138 | 1330287 | 1353419 | 1337997 | 1291603 | 1316150 | 1299443 |
| Mg   | 120                          | 1896    | 2931    | 4174    | 4220    | 3860    | 6979    | 6610    | 40214   | 39193   | 27001   | 46103   | 46270   | 27555   |
| Al   | 40                           | 562     | 177673  | 186935  | 53537   | 50561   | 18971   | 18958   | 52668   | 50785   | 73420   | 49100   | 48389   | 23382   |
| P    | 271                          | 434     | 306     | 402     | 412     | <LDL    | 509     | 538     | 878     | 943     | 1206    | 678     | 666     | <LDL    |
| K    | 130                          | 271     | 17776   | 18652   | 3296    | 2713    | 7020    | 6995    | 20798   | 19826   | 17495   | 19463   | 19165   | 8528    |
| Ca   | 91                           | 9635    | 70273   | 82855   | 371022  | 366379  | 407236  | 403367  | 357403  | 346879  | 454594  | 298129  | 297355  | 177879  |
| Mn   | 9                            | 13.6    | 58      | 66      | 117     | 102     | 1796    | 1823    | 24223   | 23607   | 23745   | 9599    | 9387    | 1896    |
| Fe   | 75                           | 246     | 21754   | 22679   | 330740  | 320225  | 179491  | 180031  | 30138   | 28631   | 47331   | 23887   | 23227   | 9048    |
| Co   | 8                            | <LDL    | <LDL    | 9.6     | 78.7    | 80.1    | 232     | 229     | 637     | 625     | 330.2   | 287.4   | 281.9   | 169.9   |
| Ni   | 11                           | <LDL    | 30      | 44      | 192     | 211     | 288     | 909     | 699     | 651     | 651.4   | 196.3   | 191.8   | 129.5   |
| Cu   | 15                           | <LDL    | 133.8   | 140.6   | 261.4   | 237.0   | 530.1   | 539.6   | 180.0   | 175.9   | 440.6   | 169.1   | 167.8   | 139.3   |
| Zn   | 13                           | 29.2    | 275     | 262     | 570     | 586     | 1413.8  | 1268.7  | 148.6   | 119.3   | 187.7   | 34.2    | 169.4   | 141.0   |
| Pb   | 59                           | <LDL    | <LDL    | <LDL    | 143     | 142     | 450     | 476     | 271     | 255     | 444     | 271     | 232     | 73      |

LDL – lower detectable level



**Table S7.** Characteristics (m ± SD) of the studied surface waters sampled at the different locations.

| Proxies                                            | Spoil heaps,<br>n=6 | Talus,<br>n=21   | Tailing ponds   |                 | Unpolluted pond,<br>n=7 |
|----------------------------------------------------|---------------------|------------------|-----------------|-----------------|-------------------------|
|                                                    |                     |                  | nearer, n=4     | farther, n=4    |                         |
| pH                                                 | <b>3.7±0.3</b>      | <b>4.0±0.6</b>   | 5.1±1.5         | <b>5.8±0.7</b>  | 7.1±0.6                 |
| EC, mS/cm                                          | <b>3.5±1.4</b>      | <b>3.2±1.4</b>   | <b>1.8±0.2</b>  | <b>1.4±0.2</b>  | 0.5±0.2                 |
| Cl <sup>-</sup> , mg/dm <sup>3</sup>               | 5.5±2.5             | 7.3±4.0          | 12.4±5.5        | 16.7±14.7       | 19.3±13.0               |
| NO <sub>3</sub> <sup>-</sup> , mg/dm <sup>3</sup>  | 2.9±3.3             | 9.4±19.0         | 1.2±0.8         | 1.6±1.0         | 3.1±2.6                 |
| SO <sub>4</sub> <sup>2-</sup> , mg/dm <sup>3</sup> | <b>2882±1362</b>    | <b>1938±1241</b> | <b>883±120</b>  | <b>761±275</b>  | 68±68                   |
| Na, mg/dm <sup>3</sup>                             | 8.3±4.1             | 11.3±6.3         | 13.6±5.7        | 12.0±5.0        | 9.8±5.7                 |
| Mg, mg/dm <sup>3</sup>                             | <b>92±44</b>        | <b>76±47</b>     | <b>48.2±8.6</b> | <b>36.8±6.7</b> | 12.1±5.3                |
| Al, mg/dm <sup>3</sup>                             | <b>279±132</b>      | <b>135±182</b>   | 6.4±5.5         | 0.4±0.5         | 0.2±0.2                 |
| P, µg/dm <sup>3</sup>                              | <b>30±33</b>        | <b>38±35</b>     | 37±40           | 32±29           | 81±58                   |
| S, mg/dm <sup>3</sup>                              | <b>1032±464</b>     | <b>789±452</b>   | <b>354±65</b>   | <b>259±49</b>   | 19±9                    |
| K, mg/dm <sup>3</sup>                              | 2.2±0.7             | 3.9±3.5          | 7.6±6.3         | 12.9±20.3       | 2.9±0.6                 |
| Ca, mg/dm <sup>3</sup>                             | <b>387±173</b>      | <b>373±141</b>   | <b>310±67</b>   | <b>241±57</b>   | 67±28                   |
| Mn, mg/dm <sup>3</sup>                             | <b>3.3±1.5</b>      | <b>7.1±5.9</b>   | <b>4.1±3.2</b>  | <b>1.7±0.6</b>  | 0.19±0.30               |
| Fe, mg/dm <sup>3</sup>                             | <b>24±23</b>        | <b>118±160</b>   | <b>2.9±1.5</b>  | 1.1±1.9         | 0.3±0.3                 |
| Co, µg/dm <sup>3</sup>                             | <b>278±134</b>      | <b>294±198</b>   | <b>91±12</b>    | <b>34±15</b>    | 0.8±0.3                 |
| Ni, µg/dm <sup>3</sup>                             | <b>452±222</b>      | <b>335±243</b>   | <b>95±22</b>    | <b>38±21</b>    | 2.1±1.8                 |
| Cu, µg/dm <sup>3</sup>                             | <b>32±8</b>         | <b>43±53</b>     | 8.1±4.9         | 5.8±2.6         | 4.3±1.7                 |
| Zn, µg/dm <sup>3</sup>                             | <b>2609±1238</b>    | <b>2087±1718</b> | <b>881±218</b>  | <b>287±203</b>  | 10±4                    |
| Pb, µg/dm <sup>3</sup>                             | 11±11               | <b>20±19</b>     | 12±13           | 4.3±0.2         | 8.1±10.4                |

m – mean, SD – standard deviation. Values significantly different from the unpolluted are marked in bold, with increased values shown in red and decreased – in blue.

**Table S8.** The spatial differentiation of the studied surface waters

| Location                | Lower values<br>(depletion)<br>(L < 0.8)             | Unsubstantial<br>differences<br>(L = 0.8 – 1.3)       | Higher values (accumulation)<br>(L > 1.3)                                                                                                                                                                                                                                                                          |
|-------------------------|------------------------------------------------------|-------------------------------------------------------|--------------------------------------------------------------------------------------------------------------------------------------------------------------------------------------------------------------------------------------------------------------------------------------------------------------------|
| Spoil heaps             | Cl <sub>0.3</sub> P <sub>0.4</sub> K <sub>0.8</sub>  | Na <sub>0.8</sub>                                     | EC <sub>7.6</sub> SO <sub>4</sub> <sup>2-</sup> <sub>42.1</sub> Mg <sub>7.6</sub> Al <sub>1187.8</sub> S <sub>53.4</sub> Ca <sub>5.8</sub> Mn <sub>17.4</sub> Fe <sub>92.1</sub><br>Co <sub>338.1</sub> Ni <sub>216.5</sub> Cu <sub>7.4</sub> Zn <sub>267.9</sub> Pb <sub>1.3</sub>                                |
| Talus                   | Cl <sub>0.4</sub> pH <sub>0.6</sub> P <sub>0.5</sub> | Na <sub>1.2</sub> K <sub>1.3</sub>                    | EC <sub>6.9</sub> SO <sub>4</sub> <sup>2-</sup> <sub>28.3</sub> Mg <sub>6.3</sub> Al <sub>575.9</sub> S <sub>40.8</sub> Ca <sub>5.6</sub> Mn <sub>37.3</sub> Fe <sub>464.4</sub><br>Co <sub>357.1</sub> Ni <sub>160.5</sub> Cu <sub>10.0</sub> Zn <sub>214.3</sub> Pb <sub>2.4</sub>                               |
| Nearest<br>tailing pond | Cl <sub>0.6</sub> pH <sub>0.7</sub> P <sub>0.5</sub> | -                                                     | EC <sub>3.9</sub> SO <sub>4</sub> <sup>2-</sup> <sub>12.9</sub> Na <sub>1.4</sub> Mg <sub>4.0</sub> Al <sub>27.2</sub> S <sub>18.3</sub> K <sub>2.6</sub> Ca <sub>4.6</sub><br>Mn <sub>21.3</sub> Fe <sub>11.5</sub> Co <sub>111.0</sub> Ni <sub>45.6</sub> Cu <sub>1.9</sub> Zn <sub>90.4</sub> Pb <sub>1.4</sub> |
| Farther tailing<br>pond | P <sub>0.4</sub> Pb <sub>0.5</sub>                   | Cl <sub>0.9</sub> pH <sub>0.8</sub> Na <sub>1.2</sub> | EC <sub>3.0</sub> SO <sub>4</sub> <sup>2-</sup> <sub>11.1</sub> Mg <sub>3.0</sub> Al <sub>1.9</sub> S <sub>13.4</sub> K <sub>4.4</sub> Ca <sub>3.6</sub> Mn <sub>9.1</sub> Fe <sub>4.3</sub><br>Co <sub>41.2</sub> Ni <sub>18.2</sub> Cu <sub>1.3</sub> Zn <sub>29.4</sub>                                         |

Numbers in brackets: L-values (an average content of a chemical element in a sampling location to the average content of the same ChE in the background area). Significantly (p<0.05) different proxies are in bold.

Table S9. Characteristics (m±SD) of the studied soil horizons.

| Proxy                      | Spolic Technosols (Arenic/Loamic, Dystric, Sulfidic, Phytotoxic) of the bare ground at the summits and slopes of the spoil heaps |             |              | Dystric Colluvic Stagnic Regosols (Arenic/Loamic, Lamellic, Areninovic, Sulfidic, Phytotoxic) of the bare ground at the talus |             |              |             |          | Colluvic Brunic Stagnic FolicRegosols (Arenic/Loamic, Lamellic, Areninovic, Toxic) over Phaeozems (Loamic) of meadows and forests at the talus |         |             |              |             |             | Un polluted Calcic Chernozems (Aric, Loamic) of meadows |           |             |
|----------------------------|----------------------------------------------------------------------------------------------------------------------------------|-------------|--------------|-------------------------------------------------------------------------------------------------------------------------------|-------------|--------------|-------------|----------|------------------------------------------------------------------------------------------------------------------------------------------------|---------|-------------|--------------|-------------|-------------|---------------------------------------------------------|-----------|-------------|
|                            | Arju, n=3                                                                                                                        | Bru, n=2    | Cru, n=10-15 | Arju, n=1                                                                                                                     | Cru, n=4-9  | 2Aygb, n=1-3 | 2Bgb, n=2-4 | 2Cg, n=1 | Ag, n=4                                                                                                                                        | Bg, n=1 | Cg, n=4-6   | 2Ayb, n=8-18 | 2Bb, n=6-11 | 2Ck, n=5    | A, n=5-8                                                | Bk, n=1-4 | Ck, n=3     |
|                            |                                                                                                                                  |             |              |                                                                                                                               |             |              |             |          |                                                                                                                                                |         |             |              |             |             |                                                         |           |             |
| pH                         | 6.1±2.2                                                                                                                          | 6.1±1.1     | 5.2±1.6      | 5.0                                                                                                                           | 4.2±1.1     | 5.0±1.7      | 5.9±1.4     | 4.9      | 5.1±0.5                                                                                                                                        | 5.6     | 4.8±0.3     | 5.3±0.8      | 6.5±1.0     | 7.1±1.2     | 6.5±0.3                                                 | 6.7±0.5   | 6.6±0.4     |
| EC, µS/cm                  | 179±225                                                                                                                          | 209±270     | 1023±733     | 243                                                                                                                           | 541±423     | 614±473      | 293±79      | 133      | 191±109                                                                                                                                        | 163     | 409±239     | 421±485      | 258±194     | 293±229     | 30±15                                                   | 21±15     | 13±2        |
| TOC, %                     | 3.5±3.1                                                                                                                          | 1.1±0.5     | 7.6±6.1      | 2.0                                                                                                                           | 8.4±3.6     | 5.8±3.7      | 1.1±0.8     | 0.4      | 9.5±3.3                                                                                                                                        | 6.8     | 8.0±3.5     | 5.3±2.8      | 1.1±0.4     | 0.67±0.37   | 3.9±2.3                                                 | 1.8±0.5   | 1.2±0.2     |
| Sand, %                    | 38.8±12.3                                                                                                                        | 14.9±17.5   | 17.2±19.8    | 47.8                                                                                                                          | 31.2±20.4   | 6.6±11.4     | <0.01       | <0.01    | 20.9±19.5                                                                                                                                      | 1.3     | 26.2±18.7   | 0.0±0.1      | <0.01       | 0.2±0.4     | <0.01                                                   | <0.01     | <0.01       |
| Silt, %                    | 49.5±10.4                                                                                                                        | 72.0±19.2   | 66.9±17.6    | 43.9                                                                                                                          | 57.5±17.1   | 77.9±9.7     | 81.1±0.7    | 81.1     | 68.1±16.7                                                                                                                                      | 82.5    | 62.3±14.7   | 80.5±1.8     | 78.6±1.7    | 77.8±4.1    | 81.6±3.8                                                | 78.1±0.4  | 72.7±7.1    |
| Clay, %                    | 11.8±2.1                                                                                                                         | 13.2±1.8    | 15.9±4.0     | 8.3                                                                                                                           | 11.3±4.0    | 15.5±2.6     | 18.6±1.0    | 18.9     | 11.0±4.1                                                                                                                                       | 16.2    | 11.5±4.5    | 19.5±1.8     | 21.4±1.7    | 22.0±4.5    | 18.4±3.8                                                | 21.9±0.4  | 27.3±7.1    |
| Fine silt, %               | 32.6±7.5                                                                                                                         | 44.5±4.9    | 44.3±12.4    | 24.9                                                                                                                          | 34.8±11.4   | 51.8±8.0     | 56.2±3.7    | 56.9     | 42.0±15.1                                                                                                                                      | 49.4    | 38.0±14.4   | 60.0±3.6     | 58.6±3.5    | 54.0±6.8    | 65.2±2.4                                                | 62.6±1.2  | 59.2±3.0    |
| Coarse silt, %             | 16.8±2.9                                                                                                                         | 27.5±14.3   | 22.6±9.5     | 19.0                                                                                                                          | 22.8±8.1    | 26.1±1.8     | 25.0±3.6    | 24.2     | 26.1±8.3                                                                                                                                       | 33.1    | 24.3±6.7    | 20.5±5.1     | 20.0±4.4    | 23.8±10.3   | 16.4±2.6                                                | 15.6±1.4  | 13.5±4.4    |
| Very fine sand, %          | 6.6±2.7                                                                                                                          | 2.2±0.5     | 5.2±6.7      | 16.1                                                                                                                          | 11.8±7.8    | 4.6±7.9      | 0.3±0.4     | <0.01    | 12.8±11.5                                                                                                                                      | 1.3     | 13.4±6.9    | 0.03±0.06    | 0.02±0.04   | 0.20±0.45   | <0.01                                                   | <0.01     | <0.01       |
| Fine sand, %               | 11.5±1.2                                                                                                                         | 5.5±7.7     | 3.8±5.0      | 13.2                                                                                                                          | 9.8±7.8     | 1.9±3.3      | <0.01       | <0.01    | 4.6±5.1                                                                                                                                        | <0.01   | 6.3±5.5     | <0.01        | <0.01       | <0.01       | <0.01                                                   | <0.01     | <0.01       |
| Medium sand, %             | 20.7±10.7                                                                                                                        | 7.3±10.3    | 8.1±14.6     | 15.5                                                                                                                          | 8.2±6.7     | 0.1±0.2      | <0.01       | <0.01    | 3.4±6.7                                                                                                                                        | <0.01   | 6.5±10.2    | <0.01        | <0.01       | <0.01       | <0.01                                                   | <0.01     | <0.01       |
| Coarse sand, %             | <0.01                                                                                                                            | <0.01       | 0.05±0.12    | 2.40                                                                                                                          | 1.19±2.01   | <0.01        | <0.01       | <0.01    | <0.01                                                                                                                                          | <0.01   | 0.03±0.08   | <0.01        | <0.01       | <0.01       | <0.01                                                   | <0.01     | <0.01       |
| Very coarse sand, %        | <0.01                                                                                                                            | <0.01       | <0.01        | 0.60                                                                                                                          | 0.26±0.51   | <0.01        | <0.01       | <0.01    | <0.01                                                                                                                                          | <0.01   | <0.01       | <0.01        | <0.01       | <0.01       | <0.01                                                   | <0.01     | <0.01       |
| Al, %                      | 3.3±0.3                                                                                                                          | 6.0±3.7     | 4.2±1.7      | 3.0                                                                                                                           | 4.8±1.7     | 4.6±1.5      | 4.2±0.0     | 4.4      | 5.0±1.2                                                                                                                                        | 3.2     | 5.4±1.0     | 5.5±1.7      | 4.3±0.2     | 4.4±0.2     | 3.7±0.4                                                 | 4.6       | 4.4±0.4     |
| Al1, g/kg                  | 0.06±0.03                                                                                                                        | 0.88±1.17   | 0.13±0.08    | 0.37                                                                                                                          | 0.35±0.39   | 0.06         | 0.18±0.07   | 0.13     | 0.61±0.26                                                                                                                                      | 0.69    | 0.80±0.21   | 0.78±0.35    | 0.36±0.62   | 0.23±0.29   | 0.13±0.05                                               | 0.25      | 0.18±0.05   |
| Al2, g/kg                  | 0.13±0.05                                                                                                                        | 0.14±0.05   | 0.32±0.31    | 0.25                                                                                                                          | 0.43±0.31   | 0.13         | 0.2±0.06    | 0.17     | 0.78±0.23                                                                                                                                      | 0.43    | 0.91±0.25   | 0.91±0.26    | 0.18±0.09   | 0.15±0.07   | 0.47±0.16                                               | 0.23      | 0.17±0.05   |
| Al3, g/kg                  | 1.1±0.7                                                                                                                          | 11.1±12.7   | 0.8±0.5      | 2.1                                                                                                                           | 2.0±1.8     | 0.4          | 4.2±0.2     | 4.0      | 4.2±1.5                                                                                                                                        | 5.6     | 4.2±2.4     | 3.4±1.0      | 4.1±0.4     | 3.9±0.6     | 3.9±0.3                                                 | 4.4       | 3.3±1.3     |
| Ca, %                      | 0.43±0.31                                                                                                                        | 0.39±0.31   | 0.39±0.22    | 0.10                                                                                                                          | 0.23±0.26   | 0.92±0.52    | 0.76±0.08   | 0.84     | 0.29±0.25                                                                                                                                      | 0.19    | 0.18±0.04   | 0.50±0.37    | 1.35±1.40   | 1.63±0.88   | 0.89±0.09                                               | 0.63      | 0.56±0.13   |
| Ca <sup>2+</sup> , mg/100g | 7±3                                                                                                                              | 23±26       | 71±57        | 19                                                                                                                            | 55±70       | 73±73        | 26±10       | 10       | 13±10                                                                                                                                          | 10      | 36±27       | 46±65        | 24±19       | 26±21       | 3±1                                                     | 3±2       | 3±1         |
| Ca1, g/kg                  | 1.81±1.42                                                                                                                        | 1.61±1.40   | 2.42±1.23    | 0.42                                                                                                                          | 1.83±2.63   | 3.30         | 3.42±0.41   | 3.90     | 1.43±1.69                                                                                                                                      | 0.98    | 0.65±0.22   | 2.52±2.21    | 8.21±11.88  | 10.55±6.84  | 3.61±0.54                                               | 2.85      | 2.53±0.81   |
| Ca2, g/kg                  | 0.18±0.28                                                                                                                        | 0.22±0.24   | 0.34±0.24    | 0.00                                                                                                                          | 0.21±0.34   | 0.66         | 0.31±0.02   | 0.31     | 0.18±0.28                                                                                                                                      | 0.08    | 0.13±0.09   | 0.33±0.40    | 0.37±0.36   | 0.39±0.29   | 0.44±0.14                                               | 0.03      | 0.16±0.05   |
| Ca3, g/kg                  | 0.50±0.47                                                                                                                        | 0.37±0.45   | 0.65±0.35    | 0.05                                                                                                                          | 0.39±0.65   | 0.61         | 0.41±0.14   | 0.34     | 0.43±0.60                                                                                                                                      | 0.20    | 0.22±0.18   | 0.78±0.79    | 0.82±0.79   | 1.00±0.76   | 1.32±0.45                                               | 0.56      | 0.42±0.05   |
| Co, mg/kg                  | 9.3±5.5                                                                                                                          | 11.5±3.5    | 6.1±3.0      | 3.0                                                                                                                           | 8.5±6.6     | 12.0±4.2     | 18.53.5     | 15.0     | 11.5±9.0                                                                                                                                       | 150.0   | 7.3±3.4     | 13.5±6.6     | 15.5±2.6    | 15.0±2.4    | 13.2±2.3                                                | 15.0      | 14.0±10.5   |
| Co1, mg/kg                 | 0.24±0.19                                                                                                                        | 0.10±0.03   | 0.78±1.26    | 0.08                                                                                                                          | 0.33±0.39   | 1.47         | 2.83±3.89   | 0.08     | 0.59±0.69                                                                                                                                      | 10.18   | 0.37±0.15   | 0.84±1.16    | 0.15±0.17   | 0.16±0.20   | 0.08±0.00                                               | 0.08      | 0.08±0.00   |
| Co2, mg/kg                 | 2.2±1.8                                                                                                                          | 1.9±2.7     | 0.8±1.0      | 0.1                                                                                                                           | 1.2±1.6     | 0.8          | 0.9±0.3     | 3.2      | 3.0±5.4                                                                                                                                        | 17.6    | 0.4±0.2     | 3.3±3.5      | 3.5±1.3     | 3.7±0.5     | 3.2±1.0                                                 | 2.8       | 3.8±2.2     |
| Co3, mg/kg                 | 3.0±2.4                                                                                                                          | 1.9±2.2     | 1.3±1.4      | 0.2                                                                                                                           | 2.0±2.7     | 1.7          | 3.9±2.6     | 1.9      | 4.3±6.9                                                                                                                                        | 51.2    | 1.3±0.8     | 4.9±4.0      | 3.1±1.1     | 2.8±0.5     | 5.1±1.4                                                 | 2.4       | 1.7±0.3     |
| Cu, mg/kg                  | 16.3±17.3                                                                                                                        | 18.3±19.3   | 20.3±21.3    | 22.3                                                                                                                          | 23.3±24.3   | 25.3±26.3    | 27.3±28.3   | 29.3     | 30.3±31.3                                                                                                                                      | 32.3    | 33.3±34.3   | 35.3±36.3    | 37.3±38.3   | 39.3±40.3   | 41.3±42.3                                               | 43.3±44.3 | 45.3±46.3   |
| Cu1, mg/kg                 | 0.12±0.09                                                                                                                        | 0.22±0.31   | 0.09±0.15    | 0.02                                                                                                                          | 0.01±0.01   | 0.11         | 0.03±0.03   | 0.13     | 0.14±0.10                                                                                                                                      | 1.43    | 0.08±0.02   | 0.08±0.13    | 0.14±0.09   | 0.19±0.14   | 0.03±0.04                                               | 0.07      | 0.32±0.36   |
| Cu2, mg/kg                 | 5.3±4.1                                                                                                                          | 1.7±1.0     | 5.1±3.5      | 2.5                                                                                                                           | 3.6±0.8     | 5.2          | 2.0±0.4     | 1.9      | 6.1±2.5                                                                                                                                        | 13.1    | 5.2±1.4     | 6.5±3.0      | 2.1±0.8     | 2.8±0.9     | 5.6±1.3                                                 | 1.6       | 1.5±0.7     |
| Cu3, mg/kg                 | 8.3±7.1                                                                                                                          | 3.5±0.1     | 7.1±4.9      | 4.3                                                                                                                           | 5.8±2.2     | 7.0          | 3.2±0.5     | 3.7      | 11.0±2.4                                                                                                                                       | 19.8    | 9.7±2.9     | 9.4±4.4      | 3.9±1.0     | 5.1±1.3     | 7.1±1.1                                                 | 3.0       | 2.8±1.0     |
| Fe, %                      | 3.1±1.5                                                                                                                          | 2.9±1.6     | 1.9±1.9      | 0.8                                                                                                                           | 1.6±0.6     | 1.8±1.0      | 2.8±0.0     | 3.1      | 2.6±2.0                                                                                                                                        | 29.6    | 1.6±0.7     | 2.6±0.9      | 2.9±0.2     | 3.0±0.3     | 2.60.2                                                  | 5.3       | 8.5±8.0     |
| Fe1, %                     | 0.022±0.037                                                                                                                      | 0.007±0.009 | 0.043±0.030  | 0.035                                                                                                                         | 0.042±0.039 | 0.021        | 0.003±0.002 | 0.002    | 0.055±0.027                                                                                                                                    | 0.358   | 0.039±0.020 | 0.030±0.020  | 0.003±0.003 | 0.002±0.002 | 0.017±0.017                                             | 0.003     | 0.004±0.002 |
| Fe2, %                     | 0.086±0.100                                                                                                                      | 0.016±0.010 | 0.179±0.082  | 0.063                                                                                                                         | 0.129±0.099 | 0.158        | 0.023±0.003 | 0.027    | 0.179±0.142                                                                                                                                    | 0.769   | 0.111±0.046 | 0.101±0.033  | 0.026±0.009 | 0.020±0.007 | 0.102±0.050                                             | 0.021     | 0.023±0.012 |
| Fe3, %                     | 0.18±0.13                                                                                                                        | 0.16±0.05   | 0.33±0.20    | 0.18                                                                                                                          | 0.25±0.13   | 0.30         | 0.22±0.01   | 0.25     | 0.88±1.13                                                                                                                                      | 10.56   | 0.28±0.09   | 0.32±0.16    | 0.26±0.03   | 0.27±0.02   | 0.33±0.14                                               | 0.18      | 0.16±0.09   |
| K, %                       | 0.92±0.37                                                                                                                        | 1.14±0.26   | 0.56±0.24    | 0.37                                                                                                                          | 0.93±0.57   | 1.32±0.70    | 2.07±0.00   | 2.03     | 0.75±0.22                                                                                                                                      | 0.39    | 0.83±0.29   | 1.41±0.41    | 2.00±0.12   | 1.87±0.07   | 1.86±0.13                                               | 1.87      | 1.47±0.66   |
| K <sup>+</sup> , mg/100g   | 0.57±0.29                                                                                                                        | 0.67±0.57   | 0.68±0.67    | 0.89                                                                                                                          | 0.84±0.45   | 1.97±1.37    | 1.13±0.79   | 0.56     | 3.13±2.68                                                                                                                                      | 5.20    | 1.53±1.06   | 1.06±0.86    | 0.53±0.55   | 0.52±0.52   | 0.39±0.61                                               | 0.18      | 0.10±0.06   |
| K1, mg/kg                  | 100±86                                                                                                                           | 106±50      | 26±30        | 7                                                                                                                             | 40±45       | 43           | 167±3       | 166      | 281±335                                                                                                                                        | 199     | 93±69       | 118±103      | 161±9       | 141±26      | 236±198                                                 | 177       | 106±43      |
| K2, mg/kg                  | 15±14                                                                                                                            | 34±5        | 14±7         | 10                                                                                                                            | 13±8        | 25           | 23±11       | 30       | 29±16                                                                                                                                          | 40      | 31±13       | 27±9         | 26±12       | 23±15       | 37±19                                                   | 13        | 31±2        |
| K3, mg/kg                  | 32±12                                                                                                                            | 112±89      | 21±14        | 37                                                                                                                            | 28±16       | 19           | 41±12       | 41       | 45±32                                                                                                                                          | 25      | 45±29       | 37±28        | 61±25       | 56±22       | 54±8                                                    | 40        | 25±3        |
| Mg, %                      | 0.28±0.15                                                                                                                        | 0.29±0.20   | 0.14±0.08    | 0.09                                                                                                                          | 0.23±0.19   | 0.38±0.27    | 0.76±0.01   | 0.81     | 0.15±0.03                                                                                                                                      | 0.07    | 0.17±0.07   | 0.38±0.18    | 0.83±0.06   | 0.82±0.11   | 0.59±0.08                                               | 0.80      | 0.60±0.24   |

|                                         |           |           |           |      |           |           |           |      |           |      |           |           |           |           |           |           |           |
|-----------------------------------------|-----------|-----------|-----------|------|-----------|-----------|-----------|------|-----------|------|-----------|-----------|-----------|-----------|-----------|-----------|-----------|
| Mg <sup>2+</sup> , mg/100g              | 0.81±0.38 | 0.67±0.24 | 2.07±1.86 | 0.88 | 1.17±0.63 | 2.01±0.37 | 2.19±0.79 | 0.85 | 0.93±0.35 | 1.13 | 1.37±0.48 | 2.07±2.54 | 2.22±1.97 | 3.36±4.46 | 0.3±70.13 | 0.29±0.17 | 0.29±0.02 |
| Mg1, mg/kg                              | 281±275   | 144±183   | 85±139    | 15   | 48±71     | 49        | 463±124   | 533  | 92±127    | 92   | 29±9      | 98±88     | 572±501   | 585±137   | 361±57    | 476       | 350±74    |
| Mg2, mg/kg                              | 5.2±6.8   | 1.0±1.5   | <0.1      | <0.1 | 0.5±1.1   | <0.1      | 1.4±1.9   | 6.9  | <0.1      | 6.3  | 0.4±0.8   | 0.6±1.8   | 6.1±12.2  | 2.9±5.5   | 0.5±1.1   | <0.1      | 5.2±8.1   |
| Mg3, mg/kg                              | 173±175   | 149±171   | 20±42     | 0    | 150±235   | 17        | 586±88    | 757  | 30±15     | <0.1 | 42±57     | 251±236   | 926±349   | 813±215   | 422±64    | 550       | 391±236   |
| Mn, mg/kg                               | 256±177   | 244±279   | 63±73     | 54   | 147±202   | 387±427   | 666±99    | 589  | 395±587   | 937  | 85±44     | 400±414   | 598±25    | 595±24    | 640±238   | 519       | 421±186   |
| Mn1, mg/kg                              | 20±20     | 6±8       | 6±9       | 1    | 10±13     | 17        | 117±158   | 6    | 82±128    | 104  | 5.0±3.3   | 34±52     | 14±8      | 23±24     | 33±17     | 5.8       | 3.5±2.1   |
| Mn2, mg/kg                              | 70±71     | 78±110    | 8±26      | <0.1 | 40±70     | 0.9       | 32±30     | 181  | 160±296   | 116  | 1.2±0.8   | 131±191   | 210±85    | 226±46    | 217±124   | 89        | 71±49     |
| Mn3, mg/kg                              | 109±99    | 83±117    | 11±33     | <0.1 | 75±115    | 2.0       | 143±46    | 91   | 234±426   | 490  | 14±15     | 161±187   | 143±41    | 139±30    | 376±205   | 98        | 44±34     |
| Na, %                                   | 0.24±0.09 | 0.24±0.14 | 0.13±0.05 | 0.16 | 0.22±0.17 | 0.33±0.27 | 0.63±0.03 | 0.68 | 0.13±0.03 | 0.08 | 0.15±0.02 | 0.32±0.20 | 0.64±0.03 | 0.59±0.04 | 0.57±0.04 | 0.53      | 0.45±0.24 |
| Na <sup>+</sup> , mg/100g               | 0.78±0.45 | 0.62±0.31 | 0.97±0.63 | 0.60 | 0.73±0.49 | 1.52±0.77 | 1.40±0.90 | 0.75 | 1.21±0.48 | 1.23 | 0.92±0.29 | 1.30±0.36 | 1.41±0.38 | 1.56±0.45 | 2.12±2.27 | 0.59±0.09 | 0.56±0.16 |
| Na1, mg/kg                              | 10.5±3.3  | 14.0±0.1  | 11.5±3.8  | 10.6 | 11.5±5.0  | 11.1      | 18.7±7.9  | 55.7 | 10.9±2.7  | 11.7 | 8.8±2.0   | 18.4±13.3 | 29.2±20.1 | 27.6±6.7  | 22.3±11.6 | 23.0      | 28.3±4.6  |
| Na2, mg/kg                              | 3.6±6.3   | 57±81     | 22.4±70.9 | <0.1 | 87±143    | 207       | 380±337   | 548  | 45±90     | 515  | 56±65     | 110±189   | 149±357   | 175±364   | 265±209   | <0.1      | 305±291   |
| Na3, mg/kg                              | 0.42±0.73 | 12±17     | 1.6±2.6   | <0.1 | 0.49±0.77 | 1.56      | 3.3±2.8   | 0.0  | 27±37     | 80   | 6.8±2.1   | 3.3±3.6   | 6.1±3.0   | 12.1±5.4  | 9.7±3.1   | 6.4       | 6.1±5.4   |
| Ni, mg/kg                               | 24±9      | 31±7      | 22±7      | 10   | 20±8      | 30±10     | 39±4      | 38   | 25±11     | 46   | 24±7      | 39±16     | 38±3      | 41±5      | 34±2      | 44        | 49±14     |
| Ni1, mg/kg                              | 0.37±0.27 | 0.43±0.16 | 0.77±1.04 | 0.07 | 0.48±0.52 | 1.14      | 2.50±2.62 | 0.49 | 0.72±0.80 | 5.85 | 0.51±0.20 | 1.99±2.11 | 0.84±0.39 | 1.38±1.98 | 1.18±0.40 | 0.93      | 0.98±0.24 |
| Ni2, mg/kg                              | 1.5±1.1   | 1.5±2.1   | 1.8±1.6   | 0.1  | 2.0±2.4   | 4.8       | 2.0±0.6   | 0.9  | 2.5±3.4   | 5.7  | 1.6±0.8   | 5.3±3.9   | 2.3±1.5   | 3.8±2.6   | 4.8±0.5   | 1.0       | 0.7±0.3   |
| Ni3, mg/kg                              | 2.8±1.9   | 3.2±2.7   | 3.0±2.5   | 0.6  | 4.1±4.3   | 3.2       | 5.4±0.8   | 4.0  | 4.6±4.2   | 9.0  | 3.8±1.4   | 9.2±6.1   | 5.4±2.0   | 6.5±2.1   | 9.0±1.0   | 3.5       | 2.5±0.6   |
| P, mg/kg                                | 538±240   | 458±340   | 210±134   | 131  | 371±364   | 568±432   | 415±31    | 349  | 480±353   | 306  | 306±123   | 540±264   | 378±66    | 314±57    | 830±260   | 655       | 1019±1048 |
| P1, mg/kg                               | 8.9±2.4   | 3.5±1.3   | 3.2±1.7   | 3.3  | 6.6.2     | 4.0       | 3.5±1.3   | 4.1  | 10.2±7.1  | 8.5  | 6.1±5.8   | 8.3±4.9   | 5.9±7.6   | 2.6±0.9   | 9.8±5.0   | 5.2±0.0   | 3.5±1.0   |
| P2, mg/kg                               | 1.2±2.1   | <0.1      | 0.19±0.61 | <0.1 | 4.6±8.7   | <0.1      | 0.18±0.25 | <0.1 | 4.5±5.3   | <0.1 | 3.4±6.9   | 5.7±7.0   | 1.2±3.0   | <0.1      | 18.2±14.8 | <0.1      | <0.1      |
| P3, mg/kg                               | 23±12     | 18±8      | 15±11     | 7    | 42±48     | 33        | 56±5      | 68   | 119±159   | 123  | 40±36     | 59±31     | 63±38     | 40±21     | 110±61    | 14±0      | 3±3       |
| Pb, mg/kg                               | 25±14     | 36±27     | 97±190    | 17   | 31±10     | 21±5      | 25±1      | 28   | 60±42     | 28   | 46±30     | 48±23     | 26±3      | 23±3      | 29±3      | 29        | 27±2      |
| Pb1, mg/kg                              | 0.25±0.00 | 0.25±0.00 | 2.02±1.84 | 0.25 | 0.66±0.43 | 1.50      | 0.68±0.10 | 0.93 | 0.56±0.36 | 0.25 | 0.67±0.42 | 1.01±0.66 | 1.05±0.59 | 0.93±0.42 | 0.93±0.55 | 0.74      | 0.83±0.52 |
| Pb2, mg/kg                              | 1.9±0.7   | 1.5±2.0   | 4.1±3.1   | 0.4  | 2.1±1.1   | 3.1       | 1.7±0.2   | 2.3  | 2.3±2.8   | 1.2  | 0.9±0.8   | 3.1±1.5   | 2.5±0.8   | 2.4±0.6   | 4.3±0.6   | 1.8       | 1.2±0.9   |
| Pb3, mg/kg                              | 4.5±0.9   | 4.0±0.9   | 10.3±12.8 | 2.7  | 4.3±1.4   | 4.9       | 5.2±1.0   | 4.8  | 6.4±4.7   | 14.1 | 3.8±2.2   | 6.6±1.6   | 5.3±0.6   | 5.2±0.7   | 7.4±0.9   | 3.3       | 2.8±2.5   |
| S, %                                    | 0.51±0.61 | 0.73±0.93 | 1.88±0.91 | 0.81 | 1.09±0.62 | 0.84±0.78 | 0.09±0.04 | 0.07 | 1.22±0.49 | 1.30 | 1.40±0.34 | 0.71±0.49 | 0.11±0.10 | 0.10±0.12 | 0.08±0.04 | 0.03      | 0.03±0.04 |
| SO <sub>4</sub> <sup>2-</sup> , mg/100g | 18±24     | 73±101    | 274±238   | 51   | 182±292   | 254±310   | 67±24     | 24   | 35±32     | 29   | 101±79    | 158±252   | 55±50     | 52±59     | 4±4       | 2±1       | 1±0       |
| S1, mg/kg                               | 102±146   | 917±1290  | 1977±1092 | 468  | 634±544   | 1715      | 383±304   | 168  | 486±420   | 3134 | 718230    | 1138±1692 | 468±536   | 437±651   | 9±5       | 5         | 7±4       |
| S2, mg/kg                               | 16±23     | 1.6±2.3   | 18±33     | 14   | 36±49     | 84        | <0.1      | <0.1 | 22±26     | 105  | 57±14     | 66±165    | 16±36     | 23±48     | 5.5±3.9   | 2.5       | 3.7±2.5   |
| S3, mg/kg                               | 156±266   | 286±404   | 715±554   | 231  | 128±90    | 794       | 9±12      | <0.1 | 256±141   | 0    | 214±76    | 178±204   | <0.1      | 95±213    | 12.2±6.7  | <0.1      | 0.0±0.0   |
| Zn, mg/kg                               | 70±34     | 78±25     | 46±36     | 24   | 52±49     | 62±10     | 60±3      | 62   | 102±122   | 451  | 46±17     | 97±53     | 67±8      | 62±8      | 68±5      | 85        | 95±44     |
| Zn1, mg/kg                              | <0.1      | <0.1      | 3.8±9.4   | <0.1 | 0.3±0.7   | 3.8       | <0.1      | <0.1 | 15±29     | 27   | <0.1      | 4.6±10.4  | <0.1      | <0.1      | <0.1      | <0.1      | 0.0±0.0   |
| Zn2, mg/kg                              | 2.0±0.7   | 2.3±0.1   | 6.3±4.8   | 1.8  | 4.5±3.1   | 9.3       | 0.9±0.2   | 0.1  | 16±22     | 19   | 5.3±2.0   | 8.7±5.4   | 0.8±0.8   | 0.6±0.2   | 3.0±2.0   | 0.7       | 1.0±0.3   |
| Zn3, mg/kg                              | 4.5±4.3   | 11.1±1.8  | 13.0±22.1 | 0.6  | 13.4±21.8 | 26.4      | 5.6±0.0   | 6.7  | 34±50     | 90   | 11.7±6.0  | 33.0±25.7 | 10.6±6.8  | 9.1±2.6   | 9.9±3.6   | 5.0       | 3.7±3.0   |

Note: Mobile fractions are shown by digits after the chemical elements as follows: 1 – exchangeable, 2 – complex, 3 – specifically adsorbed. na – not available. TOC – total organic carbon. Soil horizons are named according to [41].

**Table S10.** Spatial differentiation of the horizons of Regosols on talus at the footslope of spoil heaps.

| Location    | Proxy                               | Lower values (depletion)<br>(L <0.8)                                                                                               | Unsubstantial differences<br>(L = 0.8 – 1.3)                                                                                                   | Higher values (accumulation)<br>(L >1.3)                                                                                                                                                                              |
|-------------|-------------------------------------|------------------------------------------------------------------------------------------------------------------------------------|------------------------------------------------------------------------------------------------------------------------------------------------|-----------------------------------------------------------------------------------------------------------------------------------------------------------------------------------------------------------------------|
| Waste-rocks | Physico-chemical properties* and F0 | Ca <sub>0.7</sub> EC <sub>0.5</sub> <b>Clay</b> <sub>0.8</sub> MS <sub>0.7</sub> Mg <sub>0.7</sub> S <sub>0.5</sub>                | FSI <sub>0.9</sub> CSI <sub>1.1</sub> Na <sub>1.0</sub> silt <sub>0.9</sub> TOC <sub>1.3</sub>                                                 | CS <sub>18.6</sub> <b>VFS</b> <sub>2.4</sub> FSA <sub>1.5</sub> <b>K</b> <sub>2.5</sub> sand <sub>1.3</sub>                                                                                                           |
|             | Total content                       | Ca <sub>0.6</sub> Pb <sub>0.6</sub>                                                                                                | Al <sub>1.1</sub> K <sub>1.1</sub> Mg <sub>0.3</sub> Na <sub>1.0</sub> Ni <sub>1.0</sub> P <sub>1.2</sub> S <sub>0.8</sub>                     | Co <sub>2.5</sub> Cu <sub>1.5</sub> Fe <sub>1.7</sub> Mn <sub>2.1</sub> Zn <sub>1.7</sub>                                                                                                                             |
|             | F1                                  | <b>Ca</b> <sub>0.6</sub> Mg <sub>0.4</sub> Pb <sub>0.4</sub> S <sub>0.5</sub>                                                      | Na <sub>0.9</sub>                                                                                                                              | <b>Al</b> <sub>2.5</sub> Co <sub>1.7</sub> Cu <sub>1.3</sub> Fe <sub>1.9</sub> K <sub>1.3</sub> Mn <sub>3.6</sub> Ni <sub>1.3</sub> P <sub>1.6</sub> Zn <sub>2.2</sub>                                                |
|             | F2                                  | Ca <sub>0.5</sub> Mg <sub>0.6</sub> Pb <sub>0.5</sub>                                                                              | Cu <sub>1.1</sub> Fe <sub>1.2</sub> Ni <sub>1.3</sub>                                                                                          | <b>Al</b> <sub>2.5</sub> Co <sub>2.0</sub> K <sub>1.4</sub> Mn <sub>2.1</sub> Na <sub>3.9</sub> P <sub>10.0</sub> S <sub>2.7</sub> Zn <sub>1.7</sub>                                                                  |
|             | F3                                  | <b>Ca</b> <sub>0.6</sub> Pb <sub>0.6</sub>                                                                                         | Cu <sub>1.3</sub> K <sub>1.0</sub> Mg <sub>1.3</sub>                                                                                           | <b>Al</b> <sub>1.5</sub> Co <sub>3.1</sub> Fe <sub>3.8</sub> Mn <sub>3.0</sub> Na <sub>4.9</sub> Ni <sub>1.4</sub> P <sub>3.8</sub> S <sub>20.2</sub> Zn <sub>2.0</sub>                                               |
|             | Extractability                      | Co <sub>0.8</sub> Pb <sub>0.7</sub>                                                                                                | Ca <sub>0.9</sub> Cu <sub>1.1</sub> Fe <sub>1.2</sub> Mg <sub>0.8</sub> Ni <sub>1.2</sub> S <sub>0.9</sub> Zn <sub>1.0</sub>                   | <b>Al</b> <sub>2.2</sub> K <sub>2.2</sub> Mn <sub>1.3</sub> Na <sub>3.8</sub> P <sub>1.9</sub>                                                                                                                        |
| Ab-horizon  | Physico-chemical properties* and F0 | Na <sub>0.6</sub>                                                                                                                  | Clay <sub>1.0</sub> <b>FSI</b> <sub>0.9</sub> silt <sub>1.0</sub>                                                                              | <b>Ca</b> <sub>14.0</sub> EC <sub>13.9</sub> CSI <sub>1.3</sub> <b>K</b> <sub>2.7</sub> <b>Mg</b> <sub>5.4</sub> S <sub>39.4</sub> TOC <sub>1.4</sub>                                                                 |
|             | Total content                       | Ca <sub>0.7</sub> <b>K</b> <sub>0.7</sub> <b>Mg</b> <sub>0.6</sub> Mn <sub>0.6</sub> <b>Na</b> <sub>0.6</sub> P <sub>0.7</sub>     | Co <sub>1.0</sub> Cu <sub>1.0</sub> Fe <sub>0.9</sub> Ni <sub>1.1</sub>                                                                        | <b>Al</b> <sub>1.4</sub> Pb <sub>1.5</sub> S <sub>9.4</sub> Zn <sub>1.3</sub>                                                                                                                                         |
|             | F1**                                | Ca <sub>0.7</sub> K <sub>0.5</sub> <b>Mg</b> <sub>0.3</sub> Na <sub>0.8</sub> P <sub>0.8</sub>                                     | Mn <sub>1.0</sub> Pb <sub>1.1</sub>                                                                                                            | Al <sub>5.2</sub> <b>Co</b> <sub>12.2</sub> Cu <sub>2.7</sub> Fe <sub>1.7</sub> Ni <sub>1.6</sub> <b>S</b> <sub>128.8</sub>                                                                                           |
|             | F2                                  | K <sub>0.7</sub> Mn <sub>0.5</sub> Na <sub>0.5</sub> P <sub>0.3</sub> Pb <sub>0.7</sub>                                            | Ca <sub>0.8</sub> Co <sub>1.0</sub> Cu <sub>1.1</sub> Fe <sub>1.1</sub> Mg <sub>1.2</sub> Ni <sub>1.1</sub>                                    | Al <sub>1.7</sub> S <sub>12.3</sub> <b>Zn</b> <sub>2.9</sub>                                                                                                                                                          |
|             | F3                                  | Al <sub>0.8</sub> Ca <sub>0.6</sub> K <sub>0.7</sub> Mg <sub>0.5</sub> <b>Mn</b> <sub>0.4</sub> Na <sub>0.3</sub> P <sub>0.5</sub> | Co <sub>0.9</sub> Cu <sub>1.3</sub> Fe <sub>1.0</sub> Ni <sub>0.9</sub> Pb <sub>0.9</sub>                                                      | S <sub>20.2</sub> Zn <sub>3.3</sub>                                                                                                                                                                                   |
|             | Extractability                      | Al <sub>0.7</sub> K <sub>0.7</sub> <b>Mg</b> <sub>0.5</sub> Mn <sub>0.6</sub> P <sub>0.7</sub> <b>Pb</b> <sub>0.7</sub>            | Ca <sub>1.0</sub> Co <sub>0.8</sub> Cu <sub>1.1</sub> Fe <sub>1.2</sub> Na <sub>0.9</sub> Ni <sub>0.9</sub>                                    | S <sub>3.8</sub> <b>Zn</b> <sub>2.5</sub>                                                                                                                                                                             |
| Bb-horizon  | Physico-chemical properties* and F0 | TOC <sub>0.6</sub>                                                                                                                 | Clay <sub>1.0</sub> <b>FSI</b> <sub>0.9</sub> silt <sub>1.0</sub>                                                                              | <b>Ca</b> <sub>7.8</sub> EC <sub>13.5</sub> CSI <sub>1.4</sub> <b>K</b> <sub>4.4</sub> <b>Mg</b> <sub>7.9</sub> <b>Na</b> <sub>2.3</sub> S <sub>37.6</sub>                                                            |
|             | Total content                       | Cu <sub>0.8</sub> Fe <sub>0.5</sub> P <sub>0.6</sub> Zn <sub>0.8</sub>                                                             | Al <sub>0.9</sub> Co <sub>1.1</sub> K <sub>1.1</sub> Mg <sub>1.0</sub> Mn <sub>1.2</sub> Na <sub>1.2</sub> Ni <sub>0.9</sub> Pb <sub>0.9</sub> | Ca <sub>1.9</sub> S <sub>3.4</sub>                                                                                                                                                                                    |
|             | F1**                                | –                                                                                                                                  | Al <sub>1.2</sub> Fe <sub>1.1</sub> K <sub>0.9</sub> Mg <sub>1.1</sub> Na <sub>1.2</sub> P <sub>1.0</sub>                                      | Ca <sub>2.5</sub> Co <sub>10.9</sub> Cu <sub>1.7</sub> Mn <sub>6.9</sub> Ni <sub>1.3</sub> Pb <sub>1.3</sub> S <sub>98.8</sub>                                                                                        |
|             | F2***                               | –                                                                                                                                  | Al <sub>0.9</sub> Co <sub>1.0</sub> Cu <sub>1.3</sub> Fe <sub>1.2</sub> Pb <sub>1.3</sub> Zn <sub>1.1</sub>                                    | Ca <sub>13.1</sub> K <sub>1.9</sub> Mn <sub>1.9</sub> Ni <sub>2.2</sub> S <sub>4.8</sub>                                                                                                                              |
|             | F3****                              | –                                                                                                                                  | Al <sub>0.9</sub> Ca <sub>1.3</sub> Cu <sub>1.3</sub> Na <sub>0.8</sub>                                                                        | Co <sub>1.4</sub> Fe <sub>1.3</sub> K <sub>1.4</sub> Mg <sub>1.5</sub> Mn <sub>1.5</sub> Ni <sub>1.6</sub> P <sub>4.3</sub> Pb <sub>1.6</sub> Zn <sub>1.9</sub>                                                       |
|             | Extractability                      | –                                                                                                                                  | Al <sub>1.0</sub> Ca <sub>1.0</sub> Co <sub>1.2</sub> K <sub>1.0</sub> Mg <sub>1.3</sub>                                                       | Cu <sub>1.6</sub> Fe <sub>2.5</sub> Mn <sub>1.5</sub> Na <sub>6.7</sub> Ni <sub>1.9</sub> P <sub>5.7</sub> Pb <sub>1.7</sub> S <sub>17.5</sub> Zn <sub>2.2</sub>                                                      |
| C-horizon   | Physico-chemical properties and F0  | Clay <sub>0.8</sub> TOC <sub>0.5</sub>                                                                                             | FSI <sub>0.9</sub> silt <sub>1.1</sub>                                                                                                         | <b>Ca</b> <sub>8.8</sub> EC <sub>20.5</sub> CSI <sub>1.8</sub> K <sub>5.4</sub> <b>Mg</b> <sub>10.2</sub> <b>Na</b> <sub>2.5</sub> S <sub>46.7</sub>                                                                  |
|             | Total content                       | <b>Fe</b> <sub>0.4</sub> P <sub>0.3</sub> <b>Zn</b> <sub>0.7</sub>                                                                 | Al <sub>1.0</sub> Co <sub>1.1</sub> Cu <sub>0.8</sub> K <sub>1.3</sub> Ni <sub>0.8</sub> Pb <sub>0.9</sub>                                     | Ca <sub>2.7</sub> Mg <sub>1.4</sub> Mn <sub>1.4</sub> Na <sub>1.3</sub> S <sub>2.9</sub>                                                                                                                              |
|             | F1**                                | Cu <sub>0.6</sub> Fe <sub>0.5</sub>                                                                                                | Al <sub>1.2</sub> Na <sub>1.1</sub> Ni <sub>1.3</sub> P <sub>0.8</sub> Pb <sub>1.1</sub>                                                       | <b>Ca</b> <sub>3.7</sub> Co <sub>2.0</sub> K <sub>1.4</sub> Mg <sub>1.6</sub> <b>Mn</b> <sub>5.9</sub> <b>S</b> <sub>53.8</sub>                                                                                       |
|             | F2***                               | K <sub>0.8</sub> Mg <sub>0.7</sub> Na <sub>0.8</sub> Zn <sub>0.5</sub>                                                             | Al <sub>0.9</sub> Co <sub>1.0</sub> Fe <sub>0.9</sub>                                                                                          | Ca <sub>2.3</sub> Cu <sub>1.8</sub> <b>Mn</b> <sub>3.1</sub> Ni <sub>4.8</sub> <b>Pb</b> <sub>1.9</sub> S <sub>5.2</sub>                                                                                              |
|             | F3****                              | –                                                                                                                                  | Al <sub>1.2</sub>                                                                                                                              | Ca <sub>2.1</sub> Co <sub>1.5</sub> Cu <sub>1.7</sub> <b>Fe</b> <sub>1.7</sub> <b>K</b> <sub>2.2</sub> <b>Mg</b> <sub>2.1</sub> Mn <sub>3.0</sub> Na <sub>1.6</sub> <b>Ni</b> <sub>2.4</sub> <b>P</b> <sub>14.0</sub> |
|             | Extractability                      | Co <sub>0.8</sub> Na <sub>0.4</sub>                                                                                                | Al <sub>1.2</sub> Ca <sub>1.2</sub> K <sub>1.0</sub>                                                                                           | Pb <sub>1.8</sub> <b>Zn</b> <sub>2.3</sub>                                                                                                                                                                            |

Numbers in brackets: L-index values. Significantly (p<0.05) differed proxies are in bold. \* The content of some particle-size fraction is below 0.01%. \*\* The content of exchangeable Zn is below the detection limit in most samples from the A horizon in both compared datasets. \*\*\* The content of the F2 of Mg (only in the B horizon), Na (only in the B-horizon), and P are below the detection limit in most samples from the A horizon in both compared datasets. \*\*\*\* The content of the F3 of S is below the detection limit in most samples from the A horizon in both compared datasets. CS – coarse sand, CSI – coarse silt, EC – electrical conductivity, FSA – fine sand, FSI – fine silt, MS – medium sand, TOC – total organic carbon, VFS – very fine sand

**Table S11.** Characteristics ( $m \pm SD$ ) of the studied aerial tissues of a birch

| Elements | Plant tissue | Spoil heaps, n=3 | Talus, n=7       | Unpolluted area, n=1 | Units (dry weight) |
|----------|--------------|------------------|------------------|----------------------|--------------------|
| Ash      | L            | 11.2±8.0         | 9.2±3.9          | 7.0                  | %                  |
| Ash      | B            | 3.2±0.9          | 2.91.0           | 3.9                  | %                  |
| Al       | L            | <b>158±106</b>   | <b>124±64</b>    | 192                  | mg/kg              |
| Al       | B            | 46±10            | 32±12            | 43                   | mg/kg              |
| Ca       | L            | <b>8.4±1.4</b>   | <b>7.2±1.7</b>   | 5.1                  | g/kg               |
| Ca       | B            | 5.6±1.0          | 5.1±1.8          | 3.3                  | g/kg               |
| Co       | L            | 1.2±0.5          | 2.3±1.4          | 4.5                  | mg/kg              |
| Co       | B            | 0.63±0.22        | 0.94±0.53        | 1.82                 | mg/kg              |
| Cu       | L            | 6.2±1.5          | 7.1±1.4          | 5.1                  | mg/kg              |
| Cu       | B            | 6.4±2.3          | 6.6±1.0          | 3.9                  | mg/kg              |
| Fe       | L            | <b>165±20</b>    | <b>161±44</b>    | 207                  | mg/kg              |
| Fe       | B            | 62±12            | 60±15            | 59                   | mg/kg              |
| K        | L            | <b>8.9±1.4</b>   | <b>11.9±2.8</b>  | 12.3                 | g/kg               |
| K        | B            | 5.0±0.2          | 7.6±2.8          | 10.1                 | g/kg               |
| Mg       | L            | <b>3.0±0.9</b>   | <b>2.5±0.4</b>   | 2.9                  | g/kg               |
| Mg       | B            | 0.8±90.12        | 0.95±0.13        | 1.18                 | g/kg               |
| Mn       | L            | 0.53±0.42        | <b>0.82±0.54</b> | 1.04                 | g/kg               |
| Mn       | B            | 0.13±0.09        | 0.27±0.18        | 0.32                 | g/kg               |
| Na       | L            | 24±4             | 27±13            | 22                   | mg/kg              |
| Na       | B            | 35±10            | 39±16            | 20                   | mg/kg              |
| Ni       | L            | <b>4.5±0.4</b>   | <b>8.6±1.7</b>   | 7.1                  | mg/kg              |
| Ni       | B            | 2.8±0.6          | 4.7±1.6          | 4.1                  | mg/kg              |
| P        | L            | <b>2.2±0.5</b>   | 2.5±0.6          | 2.4                  | g/kg               |
| P        | B            | 1.3±0.0          | 1.5±0.2          | 1.6                  | g/kg               |
| Pb       | L            | 0.31±0.03        | <b>0.24±0.03</b> | 0.18                 | mg/kg              |
| Pb       | B            | 0.44±0.44        | 0.12±0.06        | 0.12                 | mg/kg              |
| S        | L            | <b>2.44±1.05</b> | <b>2.23±0.51</b> | 2.40                 | g/kg               |
| S        | B            | 0.71±0.18        | 0.75±0.08        | 0.88                 | g/kg               |
| Zn       | L            | 0.16±0.02        | 0.17±0.07        | 0.23                 | g/kg               |
| Zn       | B            | 0.15±0.02±       | 0.14±0.04        | 0.19                 | g/kg               |

L – leaves, B – branches. The chemical element concentration in leaves significantly ( $p < 0.05$ ) different from those in branches is marked in red bold

**Table S12.** Spatial differentiation of the chemical composition of the analyzed birch tissues

| Tissue   | Location       | Lower values (depletion)<br>(L <0.8)                                                                          | Unsubstantial<br>differences<br>(L = 0.8 – 1.3)                                                                     | Higher values<br>(accumulation)<br>(L >1.3)                             |
|----------|----------------|---------------------------------------------------------------------------------------------------------------|---------------------------------------------------------------------------------------------------------------------|-------------------------------------------------------------------------|
| Leaves   | Spoil<br>heaps | Co <sub>0.3</sub> Fe <sub>0.8</sub> K <sub>0.7</sub> Mn <sub>0.5</sub> Ni <sub>0.6</sub><br>Zn <sub>0.7</sub> | Al <sub>0.8</sub> Cu <sub>1.2</sub> Mg <sub>1.0</sub> Na <sub>1.1</sub> P <sub>0.9</sub><br>S <sub>1.0</sub>        | Ca <sub>1.6</sub> Pb <sub>1.8</sub>                                     |
|          | Talus          | Al <sub>0.6</sub> Co <sub>0.5</sub> Fe <sub>0.8</sub> Mn <sub>0.8</sub> Zn <sub>0.7</sub>                     | K <sub>1.0</sub> Mg <sub>0.9</sub> Na <sub>1.2</sub> <b>Ni</b> <sub>1.2</sub> P <sub>1.0</sub> S <sub>0.9</sub>     | Ca <sub>1.4</sub> Cu <sub>1.4</sub> <b>Pb</b> <sub>1.4</sub>            |
| Branches | Spoil<br>heaps | Co <sub>0.3</sub> K <sub>0.5</sub> Mg <sub>0.8</sub> Mn <sub>0.4</sub> Ni <sub>0.7</sub><br>P <sub>0.8</sub>  | Al <sub>1.1</sub> Fe <sub>1.0</sub> S <sub>0.8</sub> Zn <sub>0.8</sub>                                              | Ca <sub>1.7</sub> Cu <sub>1.6</sub> Na <sub>1.8</sub> Pb <sub>3.6</sub> |
|          | Talus          | Al <sub>0.8</sub> Co <sub>0.5</sub> K <sub>0.7</sub> Zn <sub>0.7</sub>                                        | Fe <sub>1.0</sub> Mg <sub>0.8</sub> Mn <sub>0.8</sub> <b>Ni</b> <sub>1.2</sub> P <sub>0.9</sub><br>S <sub>0.9</sub> | Ca <sub>1.5</sub> Cu <sub>1.7</sub> Na <sub>2.0</sub>                   |

Numbers in brackets: L-indices. Proxies are marked in bold in cases of significant differences between ChE content in birch trees grown on the spoil heaps and talus.

**Table S13.** A comparison of chemical element concentration in the studied surface waters and soils with the water and soil quality standards of the Russian Federation

| Chemical elements | Ratio            | Surface water       |                |                       |                         | Topsoils (0 – 20 cm) |                |                         |                      |                |                         |
|-------------------|------------------|---------------------|----------------|-----------------------|-------------------------|----------------------|----------------|-------------------------|----------------------|----------------|-------------------------|
|                   |                  |                     |                |                       |                         | Total content        |                |                         | F1                   |                |                         |
|                   |                  | Spoil heaps,<br>n=6 | Talus,<br>n=21 | Tailing ponds,<br>n=8 | Unpolluted area,<br>n=7 | Spoil heaps,<br>n=10 | Talus,<br>n=14 | Unpolluted area,<br>n=5 | Spoil heaps,<br>n=10 | Talus,<br>n=14 | Unpolluted area,<br>n=5 |
| Co                | K <sub>MPC</sub> | 3,8                 | 6.3            | 1.1                   | <0.1                    |                      | –              |                         | 0.1                  | 2.0            | <0.1                    |
|                   | N <sub>MPC</sub> | 83                  | 81             | 13                    | 0                       |                      | –              |                         | 0                    | 7              | 0                       |
|                   | MPC*             |                     |                | 0,1                   |                         |                      | –              |                         |                      | 5.0            |                         |
| Cu                | K <sub>MPC</sub> | <0.1                | 0.2            | <0.1                  | <0.1                    | 0.4                  | 0.6            | 0.3                     | 0.1                  | 0.5            | <0.1                    |
|                   | N <sub>MPC</sub> | 0                   | 0              | 0                     | 0                       | 0                    | 0              | 0                       | 0                    | 0              | 0                       |
|                   | MPC*             |                     |                | 1.0                   |                         |                      | 66             |                         |                      | 3.0            |                         |
| Fe                | K <sub>MPC</sub> | 220                 | 1759           | 14                    | 3.2                     |                      | –              |                         |                      | –              |                         |
|                   | N <sub>MPC</sub> | 100                 | 95             | 63                    | 14                      |                      | –              |                         |                      | –              |                         |
|                   | MPC*             |                     |                | 0.3                   |                         |                      | –              |                         |                      | –              |                         |
| Mg                | K <sub>MPC</sub> | 2.3                 | 3.5            | 1.1                   | 0.3                     |                      | –              |                         |                      | –              |                         |
|                   | N <sub>MPC</sub> | 83                  | 62             | 25                    | 0                       |                      | –              |                         |                      | –              |                         |
|                   | MPC*             |                     |                | 50                    |                         |                      | –              |                         |                      | –              |                         |
| Mn                | K <sub>MPC</sub> | 43                  | 222            | 88                    | 8.7                     | 0.3                  | 0.8            | 0.5                     | 0.7                  | 4.5            | 0.8                     |
|                   | N <sub>MPC</sub> | 100                 | 100            | 100                   | 57                      | 0                    | 0              | 0                       | 0                    | 14             | 0                       |
|                   | MPC*             |                     |                | 0.1                   |                         |                      | 1500           |                         |                      | 60             |                         |
| Ni                | K <sub>MPC</sub> | 31                  | 43             | 5.8                   | 0.3                     | 0.9                  | 1.2            | 0.9                     | 0.2                  | 1.5            | 0.4                     |
|                   | N <sub>MPC</sub> | 100                 | 100            | 88                    | 0                       | 0                    | 7              | 0                       | 0                    | 7              | 0                       |
|                   | MPC*             |                     | 0.02           |                       |                         |                      | 40             |                         |                      | 4.0            |                         |
| P                 | K <sub>MPC</sub> | 980                 | 979            | 979                   | 1798                    |                      | –              |                         |                      | –              |                         |
|                   | N <sub>MPC</sub> | 100                 | 100            | 100                   | 100                     |                      | –              |                         |                      | –              |                         |
|                   | MPC*             |                     |                | 0.0001                |                         |                      | –              |                         |                      | –              |                         |

|    |                  |            |            |            |            |            |            |            |      |            |      |
|----|------------------|------------|------------|------------|------------|------------|------------|------------|------|------------|------|
| Pb | K <sub>MPC</sub> | <b>3.2</b> | <b>7.8</b> | <b>3.2</b> | <b>3.2</b> | <b>9.8</b> | <b>1.6</b> | 0.5        | 0.4  | 0.2        | 0.3  |
|    | N <sub>MPC</sub> | 33         | 52         | 13         | 14         | 10         | 29         | 0          | 0    | 0          | 0    |
|    | MPC*             |            |            | 0.01       |            |            | 65         |            |      | 6.0        |      |
| S  | K <sub>MPC</sub> |            |            | –          |            | <b>209</b> | <b>116</b> | <b>7.5</b> |      | –          |      |
|    | N <sub>MPC</sub> |            |            | –          |            | 100        | 100        | 80         |      | –          |      |
|    | MPC*             |            |            |            |            |            | 160        |            |      | –          |      |
| Zn | K <sub>MPC</sub> | 0.7        | <b>1.0</b> | 0.2        | <0.1       | <b>1.0</b> | <b>4.1</b> | 0.7        | <0.1 | <b>2.5</b> | <0.1 |
|    | N <sub>MPC</sub> | 0          | 5          | 0          | 0          | 10         | 14         | 0          | 0    | 14         | 0    |
|    | MPC*             |            |            | 5          |            |            | 110        |            |      | 23         |      |

K<sub>MPC</sub> is the ratio of the actual maximal concentration of a chemical element to its maximal permissible concentration (MPC) in the Russian Federation. N<sub>MPC</sub> is the percentage of samples with concentration above the MPC. All values exceeding MPCs are shown in bold. The values exceeding MPCs by multiples of 10 and more are marked in red. \* in mg/dm<sup>3</sup> for waters and in mg/kg for soils.



**Table S14.** Correlation matrix for the elemental composition of topsoil and birch aerial tissues, n = 8

| Plant tissues | Elements | Topsoil (0 – 10 cm) |                |        |        |        |        | Branches |
|---------------|----------|---------------------|----------------|--------|--------|--------|--------|----------|
|               |          | Total content       | Extractability | F1     | F2     | F3     | F0     |          |
| Leaves        | Na       | 0.143               | -0.262         | -0.024 | -0.078 | -0.127 | -0.476 | 0.333    |
|               | Mg       | 0.786               | 0.833          | 0.738  | 0.733  | 0.857  | -0.595 | 0.714    |
|               | Al       | 0.262               | 0.143          | 0.357  | 0.429  | 0.262  | n.d.   | 0.762    |
|               | P        | 0.810               | 0.190          | 0.810  | 0.546  | 0.738  | n.d.   | 0.524    |
|               | S        | 0.299               | 0.881          | 0.429  | -0.076 | 0.619  | 0.524  | 0.881    |
|               | K        | 0.095               | 0.143          | 0.381  | 0.071  | -0.190 | 1.000  | 0.929    |
|               | Ca       | -0.238              | -0.167         | -0.381 | -0.168 | -0.524 | 0.000  | 0.905    |
|               | Mn       | 0.024               | 0.167          | 0.262  | -0.167 | 0.071  | n.d.   | 0.952    |
|               | Fe       | 0.048               | -0.429         | -0.214 | 0.024  | 0.071  | n.d.   | 0.548    |
|               | Co       | 0.108               | -0.119         | -0.252 | 0.024  | 0.048  | n.d.   | 0.952    |
|               | Ni       | -0.119              | 0.238          | 0.000  | -0.024 | 0.000  | n.d.   | 0.714    |
|               | Cu       | 0.072               | 0.599          | -0.012 | 0.333  | 0.452  | n.d.   | 0.619    |
|               | Zn       | -0.095              | 0.405          | 0.327  | 0.119  | 0.119  | n.d.   | 0.167    |
|               | Pb       | -0.167              | 0.190          | -0.218 | 0.262  | 0.119  | n.d.   | 0.571    |
| Branches      | Na       | 0.286               | -0.024         | -0.500 | -0.218 | -0.190 | -0.429 | n.d.     |
|               | Mg       | 0.857               | 0.690          | 0.810  | 0.405  | 0.905  | -0.619 | n.d.     |
|               | Al       | -0.071              | -0.381         | -0.167 | -0.024 | -0.286 | n.d.   | n.d.     |
|               | P        | 0.310               | 0.714          | 0.452  | 0.846  | 0.619  | n.d.   | n.d.     |
|               | S        | 0.299               | 0.952          | 0.357  | -0.203 | 0.643  | 0.429  | n.d.     |
|               | K        | 0.214               | 0.095          | 0.357  | -0.024 | -0.310 | 0.929  | n.d.     |
|               | Ca       | -0.524              | -0.310         | -0.571 | -0.228 | -0.690 | 0.048  | n.d.     |
|               | Mn       | -0.228              | -0.071         | 0.000  | -0.381 | -0.190 | n.d.   | n.d.     |
|               | Fe       | 0.143               | 0.071          | 0.167  | 0.262  | 0.310  | n.d.   | n.d.     |
|               | Co       | -0.072              | -0.286         | -0.275 | -0.190 | -0.143 | n.d.   | n.d.     |
|               | Ni       | -0.262              | -0.238         | -0.310 | -0.357 | -0.310 | n.d.   | n.d.     |
|               | Cu       | -0.072              | 0.587          | -0.048 | 0.095  | 0.333  | n.d.   | n.d.     |
|               | Zn       | -0.714              | -0.262         | -0.546 | -0.452 | -0.571 | n.d.   | n.d.     |
|               | Pb       | -0.452              | 0.048          | -0.546 | -0.238 | -0.452 | n.d.   | n.d.     |

The coefficients of correlation between the contents of the same chemical element in different medium are presented. Significant ( $p < 0.05$ ) values are marked in red, n.d. – not determined.
